# Supplementary figures and images for: Microfluidic cap-to-dispense (μCD): a universal microfluidic–robotic interface for automated pipette-free high-precision liquid handling
Source: Royal Society of Chemistry journal article supplement (doi:10.1039/c9lc00622b), 2019-01-01

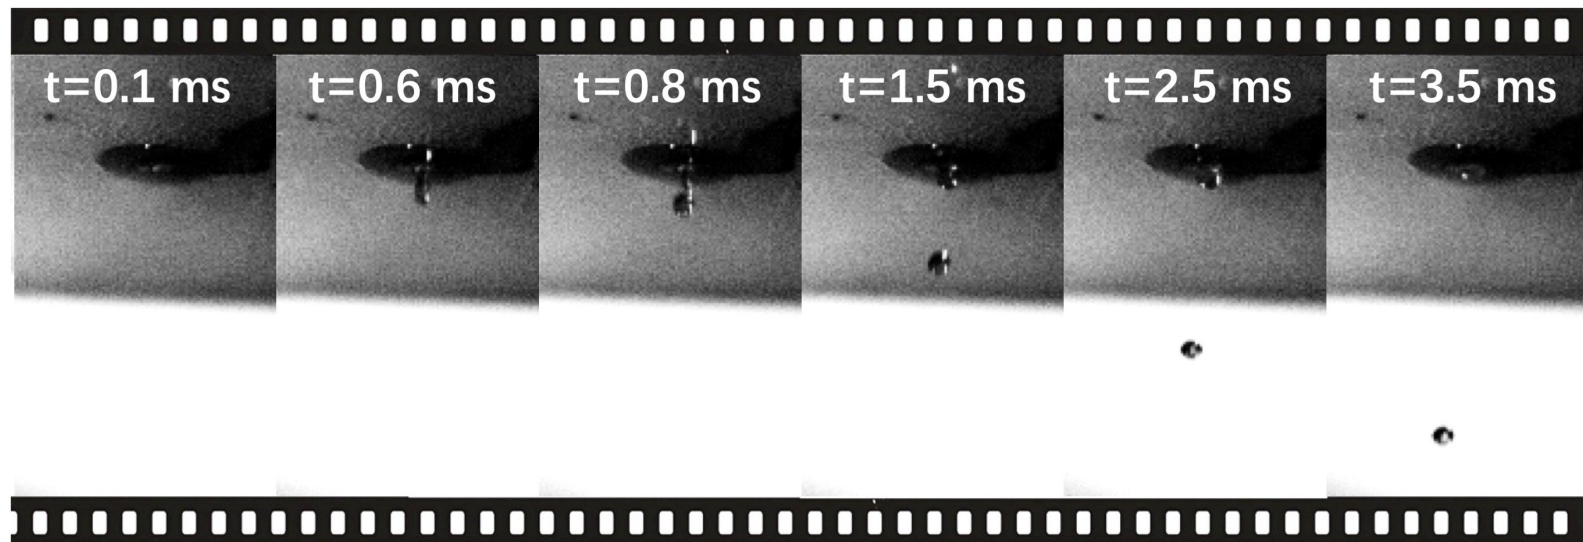

Supplement: c9lc00622b3.pdf [file c9lc00622b3.pdf]
